# Supplementary material for: Orphan nuclear receptor ERRγ is a key regulator of human fibrinogen gene expression
Source: PubMed Central journal article supplement (PMC5531639; doi:10.1371/journal.pone.0182141), 2017-07-27
Supplement: pone.0182141.s001.pdf [file pone.0182141.s001.pdf]

**S1 Table.** Primer sequences

| <b>Name</b>                       | <b>Sequence(5'-3')</b>      |
|-----------------------------------|-----------------------------|
| <b>h-FGAF</b>                     | CGTCTGCCTGGTCCTAAGTG        |
| <b>h-FGAR</b>                     | TGTCTTCCACAACCCTTGG         |
| <b>h-FGB F</b>                    | CATTAGCTCCTTCCTATCTATATCCAA |
| <b>h-FGB R</b>                    | GTGAAGGGAACAGGAAATGG        |
| <b>h-FGG F</b>                    | GACGCTGCTACTTTGAAGTCC       |
| <b>h-FGG R</b>                    | TGGATTTGCACCGTGTCTTTG       |
| <b>h-ERR<math>\gamma</math> F</b> | GCCCTCACTACACTGTGTGAC       |
| <b>h-ERR<math>\gamma</math> R</b> | CCTGCTAATTTGGACTGGTCTT-3    |
| <b>h-FV F</b>                     | GAGCAGGAAAGGAAGCATGT        |
| <b>h-FV R</b>                     | TAGCTGTGCCGCTTCTGTC         |
| <b>h-FVII F</b>                   | CTGCAGTGGGAGGACCTG          |
| <b>h-FVII R</b>                   | TTGTCACCTCCCCATTTCTC        |
| <b>h-FVIII F</b>                  | AGCTGGCCAGACTTCATTATTC      |
| <b>h-FVIII R</b>                  | CATTGGTGCCAACAGATCC         |
| <b>h-FIX F</b>                    | GATCATGGCAGAATCACCAG        |
| <b>h-FIX R</b>                    | AGAATTTTGTTGGCGTTTCA        |
| <b>h-FXF</b>                      | AGATTC AAGGTGAGGGTAGGG      |
| <b>h-FXR</b>                      | GACCACCTCCACCTCGTG          |
| <b>h-FXIF</b>                     | ACGTCCACTGCCACTTTTTC        |
| <b>h-FXIR</b>                     | GTGTCCCTGTTGGGTGTG          |
| <b>h-FXII F</b>                   | TAGGCAGCTGGACCAACG          |
| <b>h-FXII R</b>                   | GGTGGAATCGAAAGTGTTGAC       |
| <b>h-FXIIIB F</b>                 | TTGAAAACCTGACTTTTATCATCA    |
| <b>h-FXIIIB R</b>                 | GAAAACCACAGGGTTTCTCTTC      |
| <b>Chip-FGG-CONF</b>              | ATGGATAATGGA ACTCAAGG       |
| <b>Chip-FGG-CONR</b>              | TCCGAGCCTTGTAGTGTGAC        |
| <b>Chip-FGG-ERREF</b>             | CTCCTGCCACAGCCACAGAT        |
| <b>Chip-FGG-ERRER</b>             | TGGAGGCTGTGTGATGCAAC        |
