# Supplementary material for: Orphan nuclear receptor ERRγ is a key regulator of human fibrinogen gene expression
Source: PubMed Central journal article supplement (PMC5531639; doi:10.1371/journal.pone.0182141), 2017-07-27
Supplement: pone.0182141.s002.pdf [file pone.0182141.s002.pdf]

**S2 Table.** Baseline demographic characteristics

| Parameters               | Normal weight<br>(BMI<25 kg/m <sup>2</sup> )<br>N=30 | Over weight<br>(BMI≥25 kg/m <sup>2</sup> )<br>N=30 | <i>P</i> |
|--------------------------|------------------------------------------------------|----------------------------------------------------|----------|
| BMI (kg/m <sup>2</sup> ) | 24.21±0.55                                           | 29.22±3.14                                         | <0.001   |
| Age (years)              | 56.67±5.55                                           | 55.47±6.73                                         | 0.454    |
| Gender (female, n,%)     | 23(76.67)                                            | 24(80.00)                                          | 0.754    |
| Weight (kg)              | 63.48±6.23                                           | 72.24±11.57                                        | <0.001   |
| Waist circumference (cm) | 90.06±4.59                                           | 96.02±7.78                                         | <0.001   |
| SBP (mmHg)               | 127.22±15.81                                         | 133.00±13.50                                       | 0.133    |
| DBP (mmHg)               | 76.06±7.67                                           | 80.63±7.99                                         | 0.027    |
| FPG (mmol/l)             | 5.71±0.54                                            | 5.73±0.54                                          | 0.864    |
| TG (mmol/l)              | 2.02±0.85                                            | 1.97±1.27                                          | 0.866    |
| TC (mmol/l)              | 5.57±0.85                                            | 5.92±1.07                                          | 0.170    |
| LDL-c (mmol/l)           | 3.68±0.78                                            | 4.02±1.06                                          | 0.159    |
| HDL-c (mmol/l)           | 1.29±0.27                                            | 1.26±0.22                                          | 0.656    |
| ALT (IU/L)               | 23.60±7.75                                           | 27.57±14.2                                         | 0.187    |
| AST (IU/L)               | 23.17±4.47                                           | 25.33±5.94                                         | 0.116    |
| GGT (IU/L)               | 30.67±17.21                                          | 40.77±25.78                                        | 0.080    |

Data are presented as means ± SD. *P*-value is the difference between two groups using student-*t* test or  $\chi^2$ -test.

BMI: Body mass index; SBP: Systolic blood pressure; DBP: Diastolic blood pressure; FPG: Fasting plasma glucose; TG: Triglyceride; TC: Total cholesterol ; LDL-c :Low-density lipoprotein cholesterol; HDL-c: High-density lipoprotein cholesterol; ALT: Alanine transaminase; AST: Aspartate transaminase; GGT: Gamma-glutamyltransferase.
