# Supplementary material for: Orphan nuclear receptor ERRγ is a key regulator of human fibrinogen gene expression
Source: PubMed Central journal article supplement (PMC5531639; doi:10.1371/journal.pone.0182141), 2017-07-27

**S1 Fig.** Original (uncropped) blots of Figs 1B and 2B.

**1B**

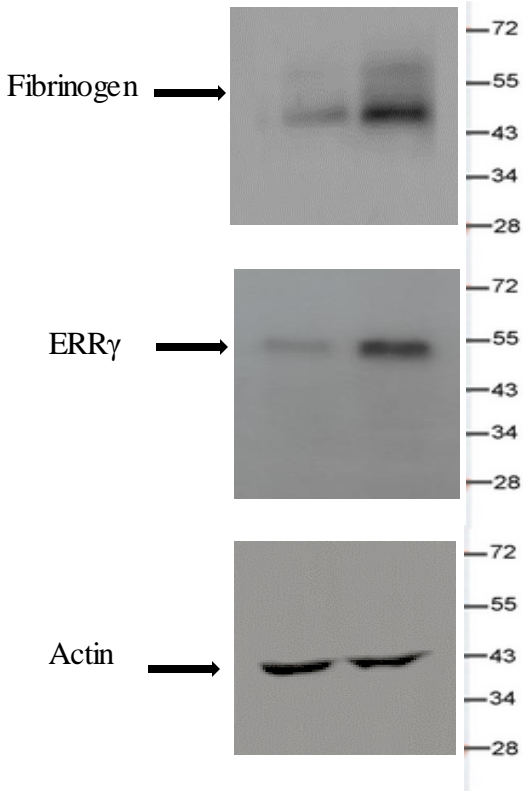

**2B**

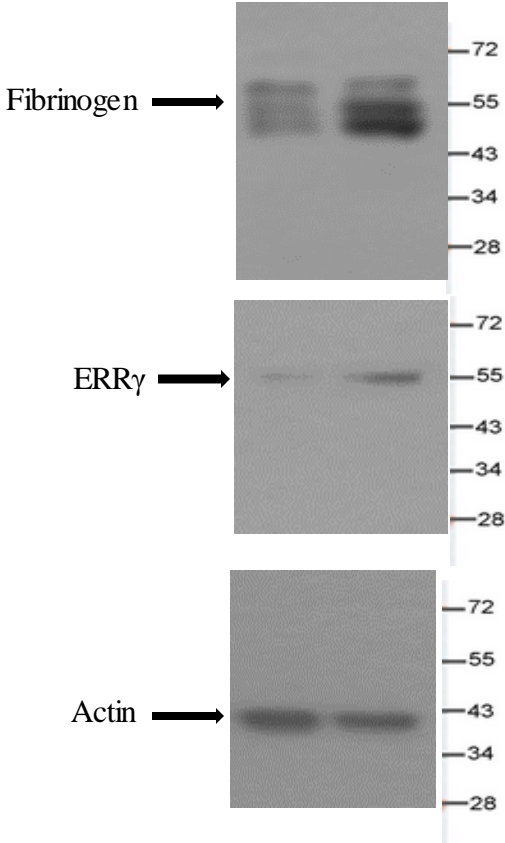

Supplement: pone.0182141.s003.pdf [file pone.0182141.s003.pdf]
